# Supplementary material for: Orphan Genes in Crop Improvement: Enhancing Potato Tuber Protein without Impacting Yield
Source: MDPI journal article supplement (doi:10.3390/plants11223076), 2022-11-13
Supplement: s1 [file s1]

## Supplementary Materials

for

# Orphan Genes in Crop Improvement: Enhancing Potato Tuber Protein without Impacting Yield

Rezwan Tanvir <sup>1</sup>, Lei Wang <sup>1</sup>, Amy Zhang <sup>1,2</sup>, Ling Li <sup>1,\*</sup>

<sup>1</sup> Department of Biological Sciences, Mississippi State University, Starkville, MS, 39762, USA

<sup>2</sup> Mississippi School for Mathematics and Science, Columbus, MS, 39701, USA

\* Correspondence: liling@biology.msstate.edu; Tel.: +1-662-325-7570

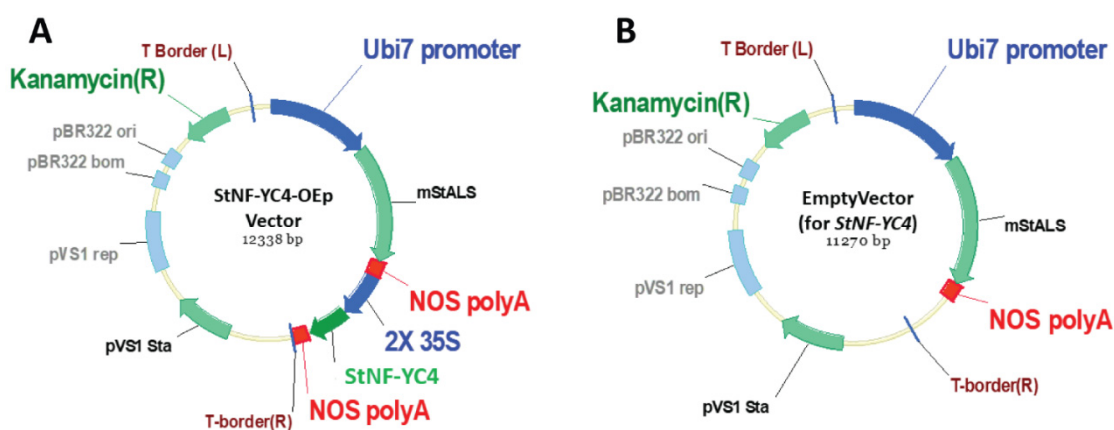

**Supplementary Figure S1.** The StNF-YC4-OE construct was used to transform the potato (*Solanum tuberosum*, Clearwater variety). (A) The complete *StNF-YC4* coding sequence (CDS) from *S. tuberosum* was inserted into a pCAMBIA-based vector under the control of an enhanced CaMV 35S promoter (2X 35S) and nopaline synthase (NOS) terminator. The construct also contained a modified version of potato *acetolactate synthase* (*StALS*, PGSC0003DMG400034102) under the control of *Ubiquitin7* promoter (*Ubi7*) and a NOS terminator, providing resistance against the ALS inhibitors for selection. (B) The empty vector without the *StNF-YC4* CDS, 2X 35S promoter, and C-Terminal NOS terminator was used as a control.

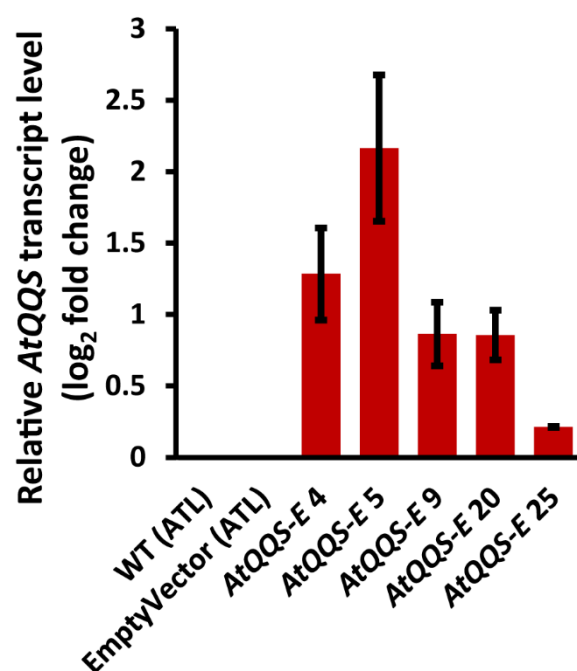

**Supplementary Figure S2.** Relative expression of *AtQQS* transcript in the potato leaf of *AtQQS-E* lines. The relative transcript levels of *AtQQS* were quantified by RT-qPCR using the *adenine phosphoribosyltransferase* (*APRT*) gene as a reference. The transcript level values are transformed by log<sub>2</sub> fold change. All tubers are of ATL variety.

PGSC0003DMP400026764

PGSC0003DMG402015259

Potato eFP Browser at bar.utoronto.ca  
Winter et al., 2007. PLoS One 2(8): e718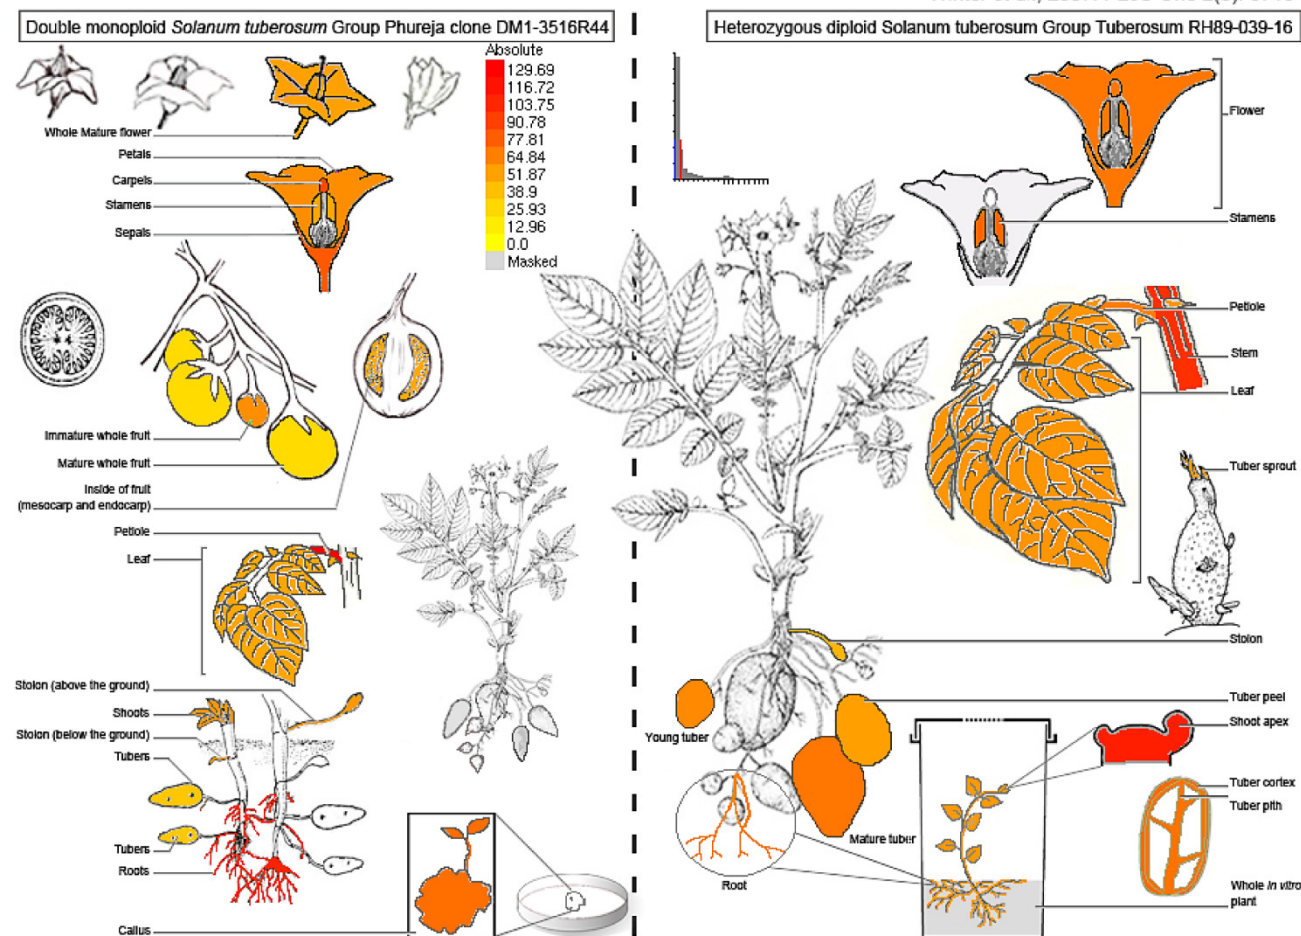

Potato eFP Browser by A.Silva. Data from Transcriptome of the Reference Potato Genome *Solanum tuberosum* Group Phureja Clone DM1-3 516R44: Massa et al., 2011. PLoS One 6(10):e26601 and Genome sequence and analysis of the tuber crop potato: The Potato Genome Sequencing Consortium, 2011. Nature 475:10.1038/nature10158. RNA seq data are normalized by the FPKM method. The developmental tissues represent vegetative and reproductive organs from greenhouse-grown plants. Shoots and roots were from in vitro-grown plants. Callus (10-11 week old) was derived from leaves and stems. Images provided by Kelly Zarka, Michigan State University and adapted from: McIntosh, Thomas P. *The Potato: Its History, Varieties, Culture and Diseases*. Great Britain: Oliver and Boyd, 1927. Vreugdenhil, Dick, et al. *Potato Biology and Biotechnology: Advances and Perspectives*. United Kingdom: Elsevier, 2007. Florida Center for Instructional Technology, 2009. *Setting up and running a school garden: A manual for teachers, parents and communities*. FAO Corporate Document Repository, 2005. *Solanum tuberosum* L., Société Française d'Ethnopharmacologie, 2010.

**Supplementary Figure S3.** *StNF-YC4* (PGSC0003DMP400026764) expression in different organs of potato plants from publicly available data (electronic fluorescent pictograph) ([http://bar.utoronto.ca/efp\\_potato/cgi-bin/efpWeb.cgi](http://bar.utoronto.ca/efp_potato/cgi-bin/efpWeb.cgi)) [1,2].

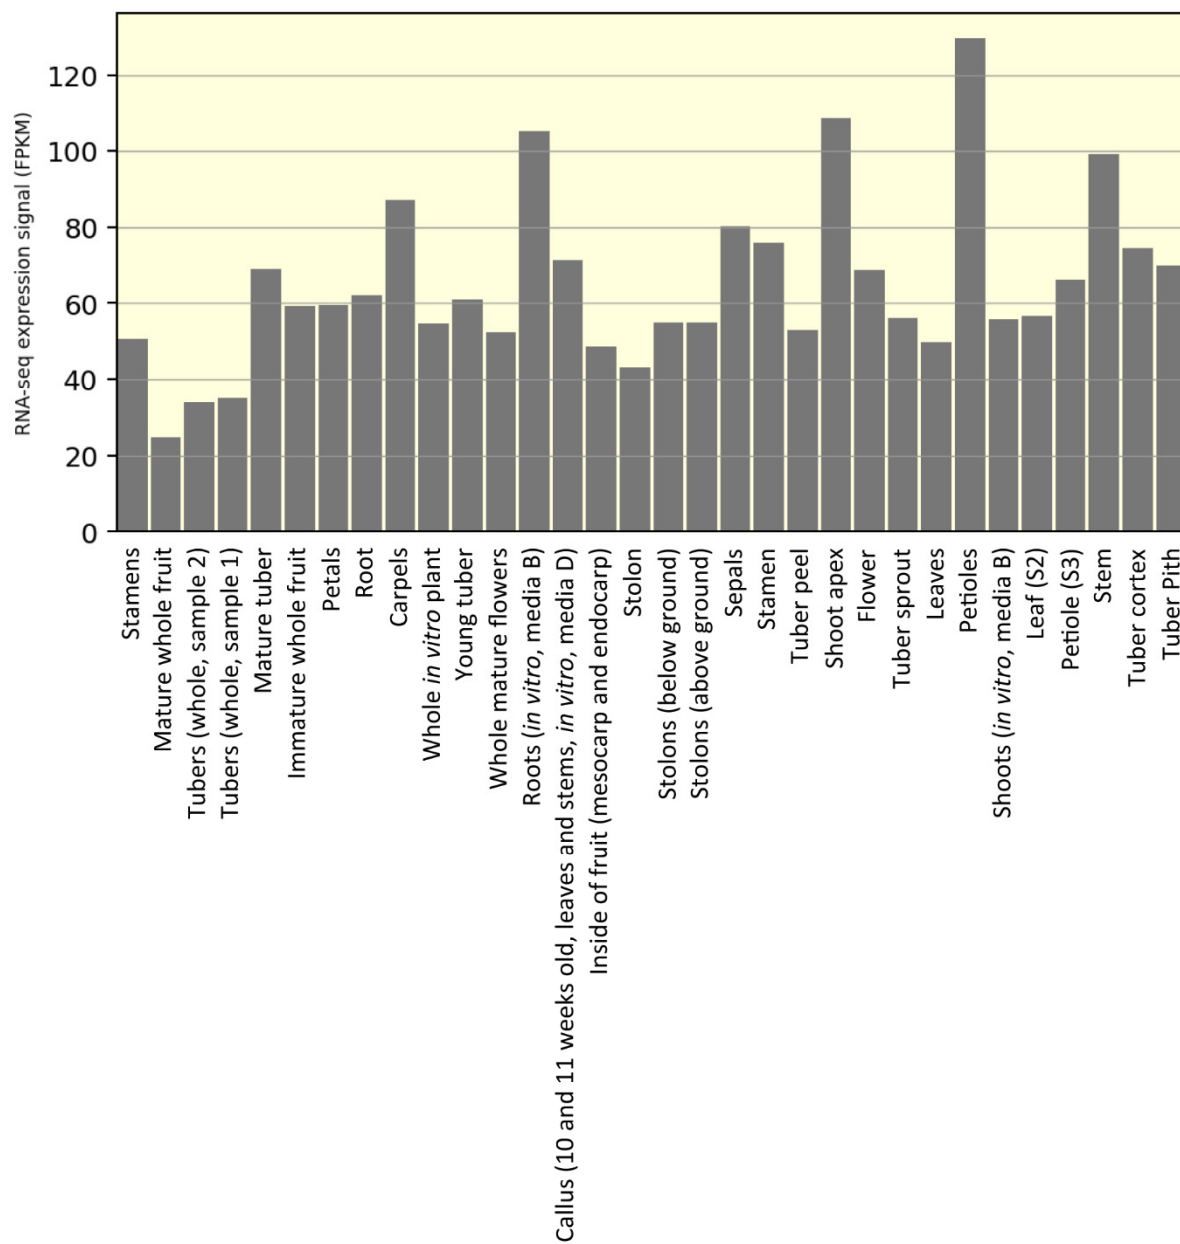

**Supplementary Figure S4.** *StNF-YC4* (PGSC0003DMP400026764) expression signal (FPKM) in different organs of potato from publicly available RNA-Seq data ([http://bar.utoronto.ca/efp\\_potato/cgi-bin/efpWeb.cgi](http://bar.utoronto.ca/efp_potato/cgi-bin/efpWeb.cgi)) [1,2].

**Supplementary Table S1.** The coding sequence of *AtQQS* and *StNF-YC4* and the peptide sequence of AtNF-YC4, StNF-YC4, NtNF-YC4, GmNF-YC4-1, and GmNF-YC4-2. The start and stop codon are underlined. The AtNF-YC4 top homolog in the potato genome was StNF-YC4 (PGSC0003DMP400026764 peptide, PGSC0003DMT400039470 transcript, NCBI ref. XP\_006351509.1). Its sequence was obtained from the International Potato Genome Sequencing Consortium (PGSC) (access date 14 July 2021). *AtQQS* (At3g30720) and *AtNF-YC4* (At5g63470) coding and peptide sequences were found in TAIR (<https://www.arabidopsis.org/>) (access date 09 June 2021). Sequences for GmNF-YC4-1 (Glyma06g17780) and GmNF-YC4-2 (Glyma04g196200) proteins were found in SoyBase (<https://www.soybase.org/>) (access date 05 March 2021). NtNF-YC4 peptide sequences were found at Zhengzhou Tobacco Research Institute of CNTC (Ntab0667000) and NCBI (AII20181, <https://www.ncbi.nlm.nih.gov/>).

| Gene                                  | Sequence information                                                                                                                                                                                                                                                                                                                                                                                                                                                                                                                                                                                                                                                                                                                                                      |
|---------------------------------------|---------------------------------------------------------------------------------------------------------------------------------------------------------------------------------------------------------------------------------------------------------------------------------------------------------------------------------------------------------------------------------------------------------------------------------------------------------------------------------------------------------------------------------------------------------------------------------------------------------------------------------------------------------------------------------------------------------------------------------------------------------------------------|
| <i>AtQQS</i><br>Coding<br>sequence    | <u>ATGAAGACCA</u> ATAGAGAGCAGGAAATTTACGTTGAAAGAAGCTTCAAAC-<br>CAAACAATTCAACAATTCAGAATTTGATGGACATTGAAAGGTTCAATTTGCCTCACACTTCTACATCA<br>GGTGTGCGCAAGGCTCAAAATGAGGGTCATATCATGGGTCTGGGCTTCAGTTCTACAACACTACTGA                                                                                                                                                                                                                                                                                                                                                                                                                                                                                                                                                                 |
| <i>StNF-YC4</i><br>Coding<br>sequence | <u>ATG</u> GAACACAGCCCTCAGCAATCGGCGGCGAATGCAGCGGCGGAGCTGCAGCAGCTCAG-<br>TCCGCTGGGTATCCGACTCAGCCACCTTACCACCATCTCCTTCAGCAACAGCAGCAGCAGTTACAGAT<br>GTTTTGGACCTACCAACGCCAGGAAATCGAACAGGTTAACGATTTTAAGAAC-<br>CATCAACTTCCCCTTGCCGAATCAAGAAGATCATGAAAGCTGACGAAGATGTCCGTATGATCTCCG<br>CTGAAGCACCCATTTTGTGGCCAAGGCATGTGAGCTTTTCATTCTGGAACCTCAC-<br>TATTCGTTCTGGCTTCACGCTGAGGAAAACAAGCGACGACTCTGCAGAAGAATGACATCGCTGCG<br>GCGATTACGCGGACTGACATTTTCGATTTCTTTGTTGACATTGTTCCGAGGGATGA-<br>GATCAAGGAAGAGGATGCTGGTCTTGGGCTGGCATGGTGGGTTCCACAGCAAGTGGTGTCCGTAC<br>TATTATCCACCAATGGGACAGCCTGCTCCACCTGGGGTGATGATGGGAAGGCCTGC-<br>TATGCCTGGGGTTGATCCTTCAATGTACGTCCAGCCTCCGCCACCACCATCGCAGGCGTGGCAGTCCG<br>TTTGGCAGGCTGCTGAGGATAATTCTTATGCTGGTGGAGGCAGCAATGGACAGGGTAACCTT-<br>GATGGTCAAAGGTAA |
| AtNF-YC4<br>Peptide<br>sequence       | MDNNNNNNNQPPPTSVYPPGSAVTTVIP PPSGSASIVTGGGATYHLLQQQQQQQLQMFWTYQRQEI-<br>EQVNDFKNHQLPLARIKKIM-<br>KADEDVRMISAEAPILFAKACELFILELTIRSWLHAEENKRRTLQKNDIAAAITRTDIFDFLVDIVPREIEKEE<br>DAASALGGGMVAPAAASGVPPYPPMGQPAVPGGMMIGRPAMDPSPGVYAQPP-<br>SQAWQSVWQNSAGGGDDVSYSGSGSGHGNLDSQG                                                                                                                                                                                                                                                                                                                                                                                                                                                                                                |
| StNF-YC4<br>Peptide<br>sequence       | MENSPQQSAANAAAAAAQSAQYPTQPPYHLLQQQQQQQLQMFWTYQRQEI-<br>EQVNDFKNHQLPLARIKKIMKADEDVRMISAEAPILFAKACELFILELTIRSWLHAEENKRRTLQKNDIAAAI<br>TRTDIFDFLVDIVPRDEIKEEDAGLGPMVGSTASGVPPYPPMGQPAVPGVMMIGRPAM-<br>PGVDPSMYVQPPPPPSQAWQSVWQAEDNSYAGGGSNGQGNLDGQS*                                                                                                                                                                                                                                                                                                                                                                                                                                                                                                                         |
| NtNF-YC4<br>Peptide<br>sequence       | MDNNPHQSPTTAAAAAAQSAQYPTQPPYHLLQQQQQQQLQMFWTYQRQEI-<br>EQANDFKNHQLPLARIKKIMKADEDVRMISAEAPILFAKACELFILELTIRSWLHAEENKRRTLQKNDIAAAI<br>TRTDIFDFLVDIVPRDEIKDESGVVLGPGMVGPTASGVPPYPPPLGQPTPPGGVMMIGRPAP-<br>MAGVDPAAFYSQPPSQAWQWQTEDNSYASGGSNGQGNLDGQK                                                                                                                                                                                                                                                                                                                                                                                                                                                                                                                         |
| GmNF-YC4-1<br>Peptide<br>sequence     | METNNQQQQQGAQAQSGYPVAGAGGSAGAGAGAPPPFQHLLQQQQQQQLQMFWSYQRQEI-<br>EHVNDFKNHQLPLARIKKIMKADEDVRMISAEAPILFAKACELFILELTIRSWLHAEENKRRTLQKNDIAAAI<br>TRTDIFDFLVDIVPRDEIKDDAALVGATASGVPPYPPPIGQPAVPGMMIGRPAP-<br>DPATGVYVQPPSQAWQSVWQSAEDASYGTGGAGAQRSLDGQS                                                                                                                                                                                                                                                                                                                                                                                                                                                                                                                       |
| GmNF-YC4-2<br>Peptide<br>sequence     | MENNNQQGAQAQSGYPVAGAGGSAGAGAGAPPPFQHLLQQQQQQQLQMFWSYQRQEI-<br>EHVNDFKNHQLPLARIKKIMKADEDVRMISAEAPILFAKACELFILELTIRSWLHADENKRRTLQKNDIAAAI<br>ITRTDIFDFLVDIVPRDEIKDDAALVGATASGVPPYPPPIGQPAVPGMMIGRPAP-<br>DPATGVYVQPPSQAWQSVWQSAEDTPYGTGAQGNLDGQSMEF                                                                                                                                                                                                                                                                                                                                                                                                                                                                                                                         |

**Supplementary Table S2.** Transcription factor binding sites are predicted in the *StNF-YC4* promoter region (2-kb upstream of the *StNF-YC4* start codon) by Nsite-PL [3,4].

| Position | TF binding site           | Verified potato TF                | Function                                                                                                                                      |
|----------|---------------------------|-----------------------------------|-----------------------------------------------------------------------------------------------------------------------------------------------|
| -224     | TCAAATATATtA<br>AAATaTaaT | Unknown nuclear factor            | AT-rich regulatory region found at <i>Lycopersicon esculentum rbcS1</i> gene [5]                                                              |
| -304     | TATCCCCAATTT<br>AATC      | GATA-1                            | Involved in light regulation of nuclear genes encoding chloroplast glyceraldehyde-3-phosphate dehydrogenase in <i>Arabidopsis</i> [6]         |
| -654     | AAAGTGGGGcCA              | Alfin1                            | Alfalfa gene improves salinity tolerance of the plants. Alfin1 expression is essential for normal plant development [7]                       |
| -958     | AGTGActaA-<br>TAGGTAA     | AGAMOUS                           | Induces the expression of KNU, A timing mechanism for stem cell maintenance and differentiation in the <i>Arabidopsis</i> floral meristem [8] |
| -1580    | GgAGGGTTCAAA              | Unknown nuclear factor, ARE 76/65 | Regulatory elements found at <i>Chlamydomonas reinhardtii Nia1</i> gene encoding nitrate reductase [9]                                        |

**Supplementary Table S3.** Putative *cis*-acting DNA elements in the promoter region (2-kb upstream of the StNF-YC4 start codon) of the *StNF-YC4* gene analyzed by PlantCARE and PLACE [10,11].

| Key Elements Name                                          | Cis-Acting Regulatory Elements | Occurrence | Putative Function                                                                                                                                                                                    | Functional Category                                    |
|------------------------------------------------------------|--------------------------------|------------|------------------------------------------------------------------------------------------------------------------------------------------------------------------------------------------------------|--------------------------------------------------------|
| -10PEHVPSBD                                                | TATTCT                         | 4          | -10 promoter element found in the barley chloroplast <i>psbD</i> gene promoter; involved in light regulation, photosynthesis, circadian system                                                       | Growth and development, starch metabolism              |
| AAGAA-motif                                                | GAAAGA, gGTAAA-GAAA            | 2          | A motif found at the promoter region of plant $\beta$ -galactosidase ( $\beta$ -Gal), <i>glycosyl hydrolase</i> ; associated with $\beta$ -galactosidase, cell wall biogenesis, and fruit softening. | Starch metabolism and storage protein                  |
| ACGTATERD1                                                 | ACGT                           | 2          | ACGT sequence required for expression of <i>erd1</i> (early responsive to dehydration) in <i>Arabidopsis</i>                                                                                         | Abiotic stress                                         |
| AMYBOX1, AMYBOX2                                           | TAACARA, TATCCAT               | 4          | Conserved sequence found in the upstream region of $\alpha$ -amylase genes                                                                                                                           | Starch metabolism and storage protein                  |
| AN-AERO1CON-SENSUS, AN-AERO2CON-SENSUS, AN-AERO3CON-SENSUS | AAACAAA, AGCAGC, TCATCAC       | 4          | Part of 16 motifs found in silico in promoters of 13 anaerobic genes involved in the fermentative pathway; associated with oxygen stress, Krebs's cycle, glycolysis                                  | Abiotic stress, starch metabolism, and storage protein |
| ARFAT                                                      | TGTCTC                         | 2          | Auxin response factor binding site found in the promoters of primary/early auxin response genes                                                                                                      | Hormones, growth, and development                      |
| ARR1AT                                                     | NGATT                          | 19         | ARR1-binding element found in <i>Arabidopsis</i> ; associated with bacterial and environmental stimuli response regulators                                                                           | Pathogen and pest resistance; Abiotic stress           |
| ASF1MO-TIFCAMV                                             | TGACG                          | 1          | ASF-1 binding site; associated with auxin, SA, xenobiotic stress, and disease resistance                                                                                                             | Pathogen, pest, abiotic stress; plant hormones         |
| BIHD1OS                                                    | TGTCA                          | 6          | The binding site of a rice TF, BELL; associated with disease resistance responses                                                                                                                    | Pathogen and pest resistance                           |
| Box 4                                                      | ATTAAT                         | 5          | Part of a conserved DNA module involved in light responsiveness, photosynthesis                                                                                                                      | Starch metabolism and storage protein                  |
| Box 5                                                      | AGCCACC                        | 1          | Promoter motifs involved in the network of Phytochrome A-regulated gene expression                                                                                                                   | Starch metabolism and storage protein                  |
| CACTFTPPCA1                                                | YACT                           | 31         | Key component of Mem1 in the cis-regulatory element of the phosphoenolpyruvate carboxylase                                                                                                           | Starch metabolism and storage protein                  |
| CAREOSREP1                                                 | CAACTC                         | 1          | RE found in the promoter of a <i>cysteine proteinase</i> ; associated with GA, aleurone, storage protein                                                                                             | Hormones, growth and development, and storage protein  |
| CARGCW8GA T                                                | CWWWWW WWWG                    | 6          | Binding site for AGL15; associated with maturity, senescence                                                                                                                                         | Growth and development                                 |

|                                   |                          |    |                                                                                                                                                                                         |                                                                              |
|-----------------------------------|--------------------------|----|-----------------------------------------------------------------------------------------------------------------------------------------------------------------------------------------|------------------------------------------------------------------------------|
| CAT-box                           | GCCACT                   | 1  | <i>Cis</i> -acting RE related to meristem-specific expression                                                                                                                           | Growth/ development, metabolism                                              |
| CGTCA-motif                       | CGTCA                    | 1  | <i>Cis</i> -acting RE involved in MeJA-responsiveness; associated with drought, abiotic stress, JA                                                                                      | Abiotic stress, hormones                                                     |
| chs-CMA2a                         | TCACCTGA                 | 1  | Part of a light-responsive element; associated with photosynthesis, starch metabolism                                                                                                   | Starch metabolism and storage protein                                        |
| CPBCSPOR                          | TATTAG                   | 3  | Critical for Cytokinin-enhanced protein binding; associated with chloroplast, photosynthesis                                                                                            | Hormones; starch and storage protein                                         |
| CURECORECR                        | GTAC                     | 4  | Core of a copper-response element; associated with hypoxic or oxygen stress                                                                                                             | Abiotic stress                                                               |
| DOFCOREZM                         | AAAG                     | 32 | Core site binding of Dof proteins; associated with carbon metabolism                                                                                                                    | Starch metabolism and storage protein                                        |
| DPBFCORED-CDC3                    | ACACNNG                  | 4  | A novel class of bZIP transcription factors binding core sequence, associated with ABA                                                                                                  | Hormones; growth and development                                             |
| EBOXBNNAPA                        | CANNTG                   | 24 | E-box of napA storage-protein gene; associated with, R-response element, and light response                                                                                             | Abiotic stress; Starch and storage protein                                   |
| EECCRAH1                          | GANTTNC                  | 3  | Consensus motif of the enhancer elements found in the promoter region of the <i>Cah1</i> (encoding carbonic anhydrase); associated with low-CO <sub>2</sub>                             | Abiotic stress, starch metabolism, and storage protein                       |
| ERE, ERELEE4                      | ATTTTAAA, AW-TTCAAA      | 4  | Ethylene-responsive element; associated with ethylene, seed germination, root nodulation, flower senescence, metabolism, and fruit ripening                                             | Hormones, growth and development, starch and storage protein                 |
| G-Box                             | GCCAC-GTGA, TCCACATG GCA | 2  | <i>Cis</i> -acting RE involved in light responsiveness; associated with REs under specific stress                                                                                       | Abiotic stress, growth, and development                                      |
| GARE1OSREP1, GAREAT               | TAACAGA, TAACAAR         | 3  | Gibberellin-responsive element; associated with GA, seed germination, starch hydrolysis                                                                                                 | Hormones, starch, growth/ development,                                       |
| GATABOX                           | GATA                     | 15 | Motif in the promoter of <i>chlorophyll a/b binding protein</i> , <i>Cab22</i> ; associated with photosynthesis                                                                         | Starch metabolism and storage protein                                        |
| GT1CONSENSUS, GT1CORE, GT1GMSCAM4 | GRWAAW, GGTAA, GAAAAA    | 43 | GT-1 motif and Consensus GT-1 binding site; associated with SA-induced gene expression, RUBISCO, pathogen-, light- and salt-induced expression                                          | Pathogen and pest resistance, abiotic stress, growth and development, starch |
| GTGANTG10                         | GTGA                     | 8  | Motif in the promoter of late pollen gene; involved in pollen, pectate lyase, reproduction                                                                                              | Growth and development                                                       |
| IBOX, IBOX-CORE                   | GATAAG, GATAA            | 6  | I-box: Conserved sequence upstream of light-regulated genes; associated with Le-MYB1 (MYB like) proteins, light response, differentiation, RUBISCO, stress, photosynthesis, and defense | Pathogen and pest resistance, abiotic stress, growth and development, starch |



|                                                                             |                                                              |    |                                                                                                                                                                                                                                                                |                                                                                                   |
|-----------------------------------------------------------------------------|--------------------------------------------------------------|----|----------------------------------------------------------------------------------------------------------------------------------------------------------------------------------------------------------------------------------------------------------------|---------------------------------------------------------------------------------------------------|
| LECPLEACS2                                                                  | TAAAATAT                                                     | 4  | Core element in Cys protease binding <i>cis</i> -element, associated with ethylene, xy-lanase, wound response, seed germination, root hair/nodulation, flower senescence, abscission, and fruit ripening                                                       | Abiotic stress, hormones, growth and development, starch and storage protein                      |
| MYB,<br>MYBIAT,<br>MYBCORE,<br>MYB-like se-<br>quence,<br>MYBPZM,<br>MYBST1 | TAACCA,<br>WAACCA,<br>CNGTTR,<br>TAACCA,<br>CCWACC,<br>GGATA | 9  | MYB or MYB-homolog recognition sites and core or consensus MYB binding sites; associated with plant's defense, stress including dehydration stress, ABA, development, differentiation, flavonoid biosynthesis                                                  | Pathogen and pest resistance, abiotic stress, growth and development, hormones, starch metabolism |
| MYC, MY-<br>CATERD1, MY-<br>CATRD22, MY-<br>CCONSEN-<br>SUSAT               | CAATTG,<br>CATGTG,<br>CACATG,<br>CANNTG                      | 39 | MYC <i>cis</i> -elements, binding and recognition sites; associated with cold stress, JA, light signaling, dehydration, ABA                                                                                                                                    | Abiotic stress, hormones, growth, and development, starch metabolism                              |
| NAPINMO-<br>TIFBN                                                           | TACACAT                                                      | 3  | Found in upstream region 2 <i>S albumin</i> gene; associated with seed storage protein                                                                                                                                                                         | Starch metabolism and storage protein                                                             |
| NTBBF1AR-<br>ROLB                                                           | ACTTTA                                                       | 2  | Dof protein from tobacco binding site; associated with auxin, tissue-specific expression                                                                                                                                                                       | Hormones, growth, and development                                                                 |
| O2-site                                                                     | GATGATGT<br>GG                                               | 1  | <i>Cis</i> -acting RE involved in zein metabolism                                                                                                                                                                                                              | Metabolism                                                                                        |
| OSE2ROOT-<br>NODULE                                                         | CTCTT                                                        | 4  | Consensus sequence motifs of the promoters activated in infected cells of root nodules                                                                                                                                                                         | Pathogen and pest resistance                                                                      |
| POLASIG1, PO-<br>LASIG2, PO-<br>LASIG3                                      | AATAAA,<br>AATTAAA,<br>AATAAT                                | 31 | Poly A signal (or consensus sequence) found in the promoter regions of the $\alpha$ - <i>amylase</i> gene                                                                                                                                                      | Starch metabolism and storage protein                                                             |
| POL-<br>LEN1LELAT52                                                         | AGAAA                                                        | 16 | Co-dependent REs responsible for pollen-specific activation of <i>lat52</i> gene; associated with endo- $\beta$ -mannanase, pollen-specific expression                                                                                                         | Growth and development                                                                            |
| PREATPRODHD                                                                 | ACTCAT                                                       | 1  | Pro- or hypoosmolarity-responsive element in the promoter region of <i>proline dehydrogenase</i> gene                                                                                                                                                          | Abiotic stress                                                                                    |
| PYRIM-<br>IDINEBOXHVE<br>PB1, PYRIM-<br>IDINEBOX-<br>OSRAMY1A               | TTTTTCC,<br>CCTTTT                                           | 3  | Found in the <i>cysteine proteinase</i> gene promoter; associated with GA, ABA, germination, root hair/ nodulation, senescence, abscission, and fruit ripening, stress and wound, aleurone, protein degradation, $\alpha$ - <i>amylase</i> , sugar repression, | Abiotic stress, hormones, growth and development, starch and storage protein                      |
| QELE-<br>MENTZMZM13                                                         | AGGTCA                                                       | 1  | Q element in ZM13 gene promoter; associated with pollen, hybrid breeding, and seed production                                                                                                                                                                  | Growth and development                                                                            |
| RAV1AAT                                                                     | CAACA                                                        | 1  | Consensus sequence of TF, RAV1; associated with pathogen-induced transcription, drought and salt tolerance, germination, and seedling development                                                                                                              | Pathogen, pest, abiotic stress, growth and development                                            |
| RBCSCONSEN-<br>SUS                                                          | AATCCAA                                                      | 1  | Consensus sequence for RUBISCO                                                                                                                                                                                                                                 | Growth and development, starch                                                                    |

|                                         |                            |    |                                                                                                                                                       |                                                               |
|-----------------------------------------|----------------------------|----|-------------------------------------------------------------------------------------------------------------------------------------------------------|---------------------------------------------------------------|
| ROOTMO-TIFTAPOX1                        | ATATT                      | 32 | Motif found in promoters of <i>rolD</i> ; associated with early reproductive phase and flowering                                                      | Growth and development                                        |
| SEB-FCONSSTPR10A                        | YTGTCWC                    | 10 | Binding site of SEBF pathogenesis-related gene ( <i>PR-10a</i> )                                                                                      | Pathogen and pest resistance                                  |
| SEF1MOTIF, SEF3MO-TIFGM, SEF4MO-TIFGM7S | ATATTTAWW, AACCCA, RTTTTTR | 9  | Binding motif (or consensus sequence) found in upstream region $\beta$ -conglucinin (7S globulin); associated with legume seed storage protein        | Starch metabolism and storage protein                         |
| SORLIP1AT, SORLIP2AT, SORLREP3AT        | GCCAC, GGGCC, TGTATA-TAT   | 8  | Sequences over-represented in light-induced or repressed, phyA-induced motifs; associated with light-induced and root-specific genes expression       | Growth/ development, starch metabolism, and storage protein   |
| SP8BFIBSP8BIB                           | TACTATT                    | 1  | SPBF binding site at the upstream of <i>sporamin</i> gene and $\beta$ -amylase gene                                                                   | Starch metabolism and storage protein                         |
| SREATMSD                                | TTATCC                     | 2  | Sugar-repressive element associated with stem decapitation and axillary bud out-growth                                                                | Growth and development                                        |
| STRE                                    | AGGGG                      | 5  | The SEB-1 TF binds to the STRE Motif; associated with regulation of cellular processes, stress response, and reserve carbohydrate metabolism          | Abiotic stress, growth, and development, starch metabolism    |
| SURECOREATS ULTR11                      | GAGAC                      | 2  | Core of sulfur-responsive element in the promoter of <i>SULTR1</i> ; associated with sucrose responsive element, auxin, sulfur response, stress       | Abiotic stress, hormones, growth, and development, starch     |
| SV40COREEN-HAN                          | GTGG-WWHG                  | 1  | SV40 core enhancer, similar sequences found in <i>RUBISCO</i> genes                                                                                   | Starch metabolism                                             |
| TAAAGSTKST1                             | TAAAG                      | 10 | TAAAG motif in the promoter of <i>S. tuberosum KST1</i> gene; associated with expression of multiple genes involved in carbon metabolism              | Starch metabolism and storage protein                         |
| TATAPVTR-NALEU                          | TTTATATA                   | 1  | A TATA-like motif; associated with carbohydrate degradation                                                                                           | Growth/ development, starch metabolism                        |
| TATCCA-OSAMY, TATCCAYMO-TIFOSRAMY3D     | TATCCA, TATCCAY            | 4  | Found in $\alpha$ -amylase promoters; associated with MYB proteins, GA, plant defense, biotic and abiotic stresses                                    | Pathogen/ pest, abiotic stress, hormones, growth/ development |
| TCA-element                             | CCATCTTTT                  | 1  | SA response element; associated with systemic expression of pathogenesis-related proteins                                                             | Pathogen and pest resistance                                  |
| TGACG-motif                             | TGACG                      | 1  | Cis-acting regulatory element involved in the MeJA-responsiveness; associated with plant defense and development, JA                                  | Pathogen and pest resistance, hormones, growth/ development   |
| TGAC-GTVMAMY                            | TGACGT                     | 1  | Found in the $\alpha$ -amylase gene promoter; associated with expression of $\alpha$ -amylase in the cotyledons of the germinated seeds, MYB proteins | Growth/ development, starch metabolism, and storage protein   |

|                                       |                       |    |                                                                                                                                            |                                                             |
|---------------------------------------|-----------------------|----|--------------------------------------------------------------------------------------------------------------------------------------------|-------------------------------------------------------------|
| Unnamed__4                            | CTCC                  | 11 | Sequence within <i>DYT1</i> promoter; associated with <i>DYT1</i> expression, anther development/ function.                                | Growth and development                                      |
| WBOX-ATNPRI, WBOXNT-CHN48, WBOXNTERF3 | TTGAC, CTGACY, TGACY  | 11 | W-box found in the promoter <i>WRKY</i> ; Associated with SA, disease resistance, elicitor-response, wound response, and stress resistance | Pathogen and pest resistance, abiotic stress, hormones      |
| WBOXHVISO1                            | TGACT                 | 4  | W-box element in <i>isoamylase1</i> promoter; associated with patatin, <i>WRKY</i> , isoamylase, starch                                    | Starch metabolism and storage protein                       |
| WRE3, WUN-motif                       | CCACCT, CAATTACA<br>T | 3  | Wound-response element                                                                                                                     | Abiotic stress                                              |
| WRKY71OS                              | TGAC                  | 12 | Binding site of <i>WRKY71</i> at <i>amylase</i> promoter; associated with GA and <i>Pathogenesis-Related Class10 (PR-10)</i> genes         | Pathogen/ pest, abiotic stress, hormones, starch metabolism |
| WUSATAg                               | TTAATGG               | 1  | Target sequence of <i>WUS</i> in the intron of <i>AGAMOUS</i> gene                                                                         | Growth and development                                      |

**Supplementary Table S4.** Protein-protein interactions of StNF-YC4 are predicted by STRING Database [12].

| ID                   | Details                                                                                                                 | Scores |
|----------------------|-------------------------------------------------------------------------------------------------------------------------|--------|
| PGSC0003DMT400067767 | Uncharacterized protein; DNA polymerase epsilon P17 subunit                                                             | 0.967  |
| PGSC0003DMT400010977 | Nuclear transcription factor y subunit b-3; Uncharacterized protein; CCAAT-binding transcription factor subunit A       | 0.950  |
| PGSC0003DMT400004366 | Nuclear transcription factor y subunit b-10-like; Uncharacterized protein; CCAAT-binding transcription factor subunit A | 0.922  |
| PGSC0003DMT400054416 | Uncharacterized protein; Nuclear transcription factor Y subunit A-4                                                     | 0.893  |
| PGSC0003DMT400079711 | DNA polymerase epsilon subunit; Participates in DNA repair and in chromosomal DNA replication                           | 0.876  |
| PGSC0003DMT400055061 | Nuclear transcription factor y subunit a-10; Uncharacterized protein; YA1                                               | 0.853  |
| PGSC0003DMT400072322 | Nuclear transcription factor y subunit a-10-like; Uncharacterized protein; YA1                                          | 0.853  |
| PGSC0003DMT400095009 | Nuclear transcription factor y subunit b-3-like; Uncharacterized protein; CCAAT-binding transcription factor subunit A  | 0.852  |
| PGSC0003DMT400000740 | Uncharacterized protein; YA5                                                                                            | 0.819  |
| PGSC0003DMT400006358 | Nuclear transcription factor y subunit a-3-like; Uncharacterized protein; YA6                                           | 0.819  |

## References

1. Winter, D.; Vinegar, B.; Nahal, H.; Ammar, R.; Wilson, G.V.; Provart, N.J. An “Electronic Fluorescent Pictograph” browser for exploring and analyzing large-scale biological data sets. *PLoS One* **2007**, *2*, e718. <https://doi.org/10.1371/journal.pone.0000718>.
2. Massa, A.N.; Childs, K.L.; Lin, H.; Bryan, G.J.; Giuliano, G.; Buell, C.R. The transcriptome of the reference potato genome *Solanum tuberosum* Group Phureja clone DM1-3 516R44. *PLoS One* **2011**, *6*, e26801. <https://doi.org/10.1371/journal.pone.0026801>.
3. Shahmuradov, I.A.; Solovyev, V.V. Nsite, NsiteH and NsiteM computer tools for studying transcription regulatory elements. *Bioinformatics* **2015**, *31*, 3544–3545. <https://doi.org/10.1093/bioinformatics/btv404>.
4. Solovyev, V.V.; Shahmuradov, I.A.; Salamov, A.A. Identification of promoter regions and regulatory sites. In *Computational Biology of Transcription Factor Binding*, Ladunga, I., Ed.; Springer: New Jersey, 2010; pp. 57–83.
5. Outchkourov, N.S.; Peters, J.; De Jong, J.; Rademakers, W.; Jongsma, M.A. The promoter–terminator of chrysanthemum *rbcS1* directs very high expression levels in plants. *Planta* **2003**, *216*, 1003–1012. <https://doi.org/10.1007/s00425-002-0953-8>.
6. Jeong, M.-J.; Shih, M.-C. Interaction of a GATA factor with cis-acting elements involved in light regulation of nuclear genes encoding chloroplast glyceraldehyde-3-phosphate dehydrogenase in *Arabidopsis*. *Biochem. Biophys. Res. Commun.* **2003**, *300*, 555–562. [https://doi.org/10.1016/S0006-291X\(02\)02892-9](https://doi.org/10.1016/S0006-291X(02)02892-9).
7. Winicov, I.I.; Bastola, D.R. Transgenic overexpression of the transcription factor *alfin1* enhances expression of the endogenous *MsPRP2* gene in alfalfa and improves salinity tolerance of the plants. *Plant Physiol.* **1999**, *120*, 473–480. <https://doi.org/10.1104/pp.120.2.473>.
8. Sun, B.; Xu, Y.; Ng, K.-H.; Ito, T. A timing mechanism for stem cell maintenance and differentiation in the *Arabidopsis* floral meristem. *Genes Dev.* **2009**, *23*, 1791–1804. <https://doi.org/10.1101/gad.1800409>.
9. Loppes, R.; Radoux, M.; Ohresser, M.C.P.; Matagne, R.F. Transcriptional regulation of the *Nia1* gene encoding nitrate reductase in *Chlamydomonas reinhardtii*: effects of various environmental factors on the expression of a reporter gene under the control of the *Nia1* promoter. *Plant Mol. Biol.* **1999**, *41*, 701–711. <https://doi.org/10.1023/A:1006381527119>.
10. Higo, K.; Ugawa, Y.; Iwamoto, M.; Korenaga, T. Plant cis-acting regulatory DNA elements (PLACE) database: 1999. *Nucleic Acids Res.* **1999**, *27*, 297–300. <https://doi.org/10.1093/nar/27.1.297>.
11. Lescot, M.; Déhais, P.; Thijs, G.; Marchal, K.; Moreau, Y.; Van de Peer, Y.; Rouzé, P.; Rombauts, S. PlantCARE, a database of plant cis-acting regulatory elements and a portal to tools for in silico analysis of promoter sequences. *Nucleic Acids Res.* **2002**, *30*, 325–327. <https://doi.org/10.1093/nar/30.1.325>.
12. Szklarczyk, D.; Gable, A.L.; Nastou, K.C.; Lyon, D.; Kirsch, R.; Pyysalo, S.; Doncheva, N.T.; Legeay, M.; Fang, T.; Bork, P.; et al. The STRING database in 2021: customizable protein-protein networks, and functional characterization of user-uploaded gene/measurement sets. *Nucleic Acids Res.* **2021**, *49*, D605–D612. <https://doi.org/10.1093/nar/gkaa1074>.
